# Supplementary material
Source: HighWire-hosted journal article supplement (https://diabetes.diabetesjournals.org/content/suppl/2008/03/20/db07-1577)

Supplementary Figure 1

A.

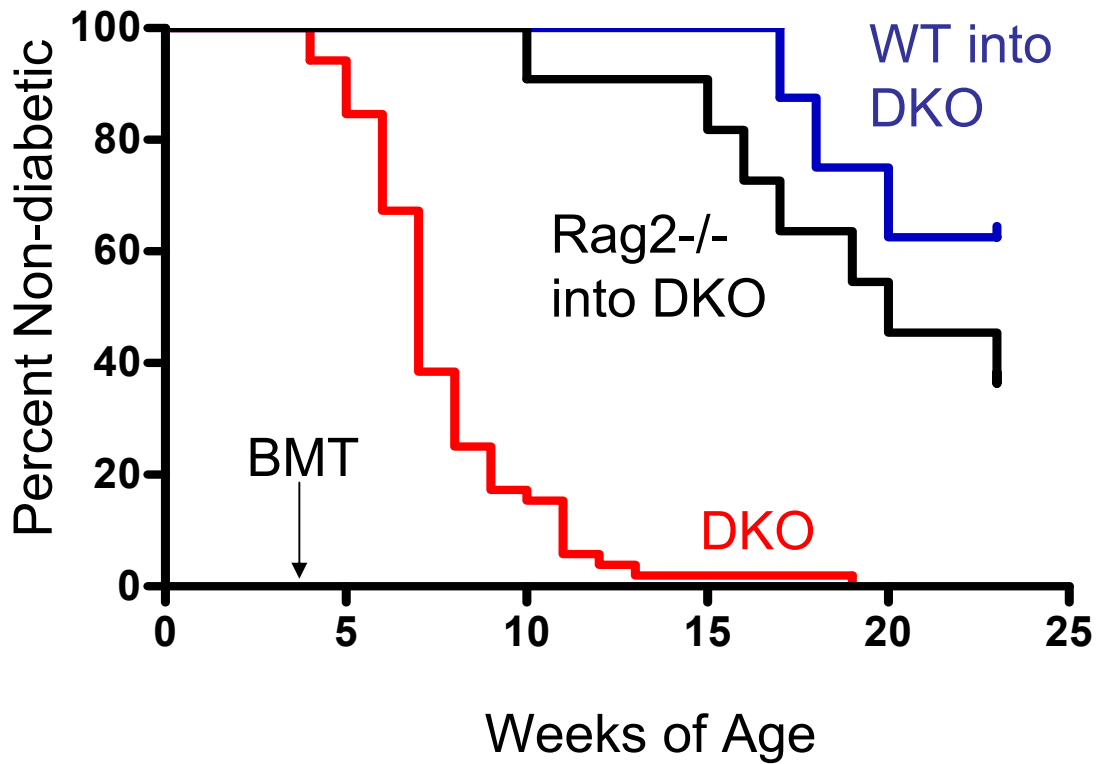

B.

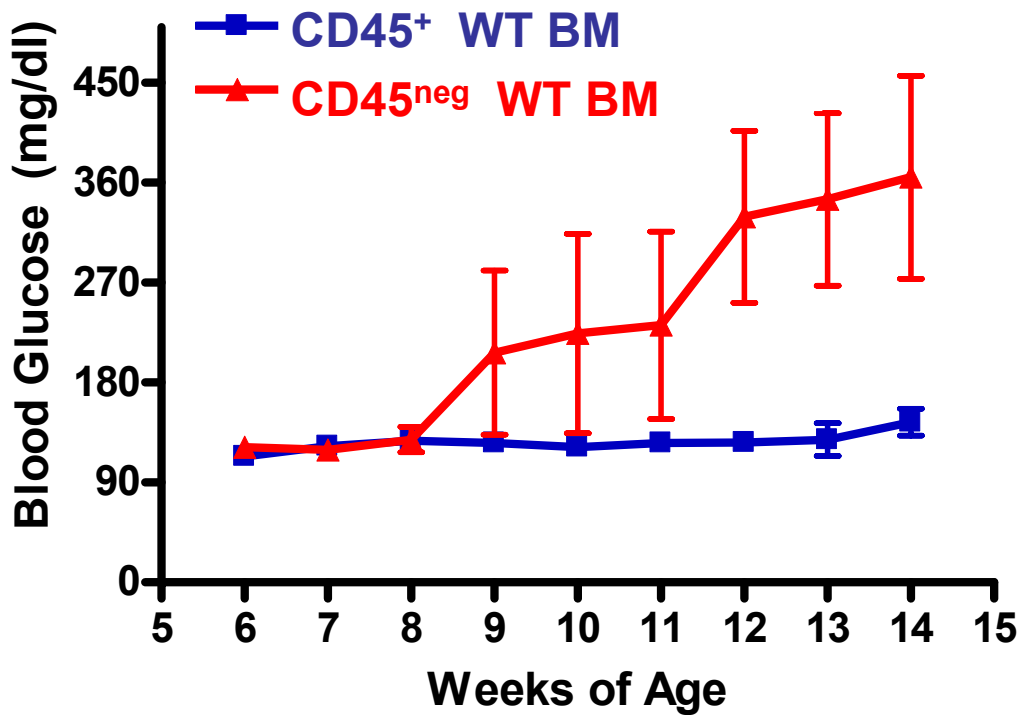

# Supplementary Figure 2

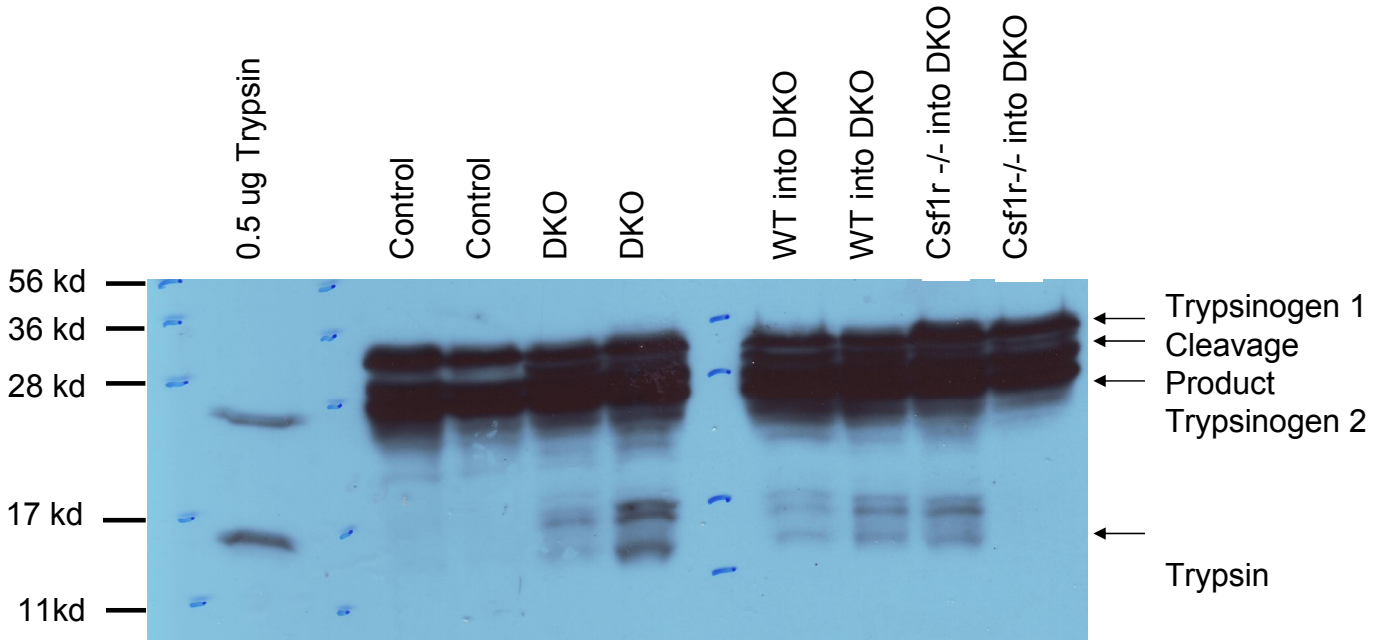

### Supplementary Figure 3

| Gene   | Caerulein | TAM   | MSC   | M1    | M2    |
|--------|-----------|-------|-------|-------|-------|
| Ly6a   | Red       | Red   | White | White | White |
| Ly6e   | Red       | Red   | Green | White | White |
| CD81   | Red       | Red   | White | White | White |
| Msr2   | Red       | Red   | White | Green | Red   |
| C1qa   | Red       | Red   | Green | Red   | Red   |
| Axl    | Red       | Red   | White | White | White |
| Cxcl10 | Red       | Red   | White | Red   | Green |
| Ccl5   | Red       | Red   | Red   | Red   | Green |
| Ccl2   | Red       | Red   | White | Blue  | Blue  |
| Irf7   | Red       | Red   | Red   | Red   | Blue  |
| Tgfb1  | Red       | Red   | White | Blue  | Red   |
| Aif1   | Red       | Red   | Green | White | White |
| Ifit3  | Red       | Red   | Green | Red   | Green |
| IL11Ra | Green     | Green | White | Blue  | Blue  |
| Ccl4   | Green     | Green | White | Blue  | Blue  |
| Cxcl1  | Red       | White | Red   | White | White |
| Ccl3   | Red       | Green | Red   | Blue  | Blue  |
| IL6    | Red       | White | Red   | Red   | Blue  |
| IL12   | Green     | Green | Red   | Red   | Green |
| Cxcl9  | Red       | White | White | Red   | Green |
| Ccl19  | Green     | White | Blue  | Red   | Green |
| Cxcr4  | Red       | Blue  | Blue  | Green | Red   |
| Arg1   | Red       | White | Red   | Blue  | Red   |
| IL10   | Red       | Red   | Green | Green | Red   |
| CD36   | Red       | White | White | Green | Red   |
| CD14   | Red       | White | White | Green | Red   |
| MSR1   | Red       | Red   | White | Green | Red   |
| Mrc1   | Red       | White | Red   | Green | Red   |

## Supplementary Figure 4

**A.**

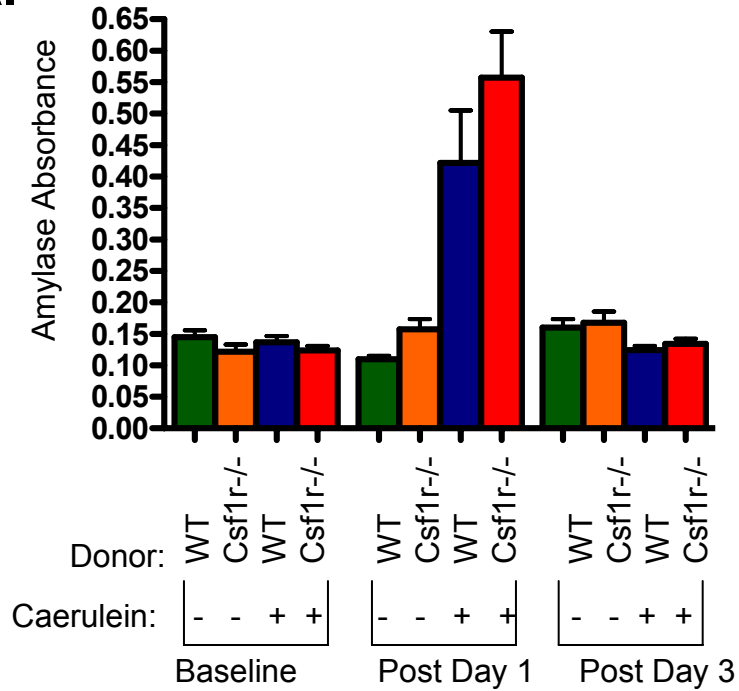

**B.**

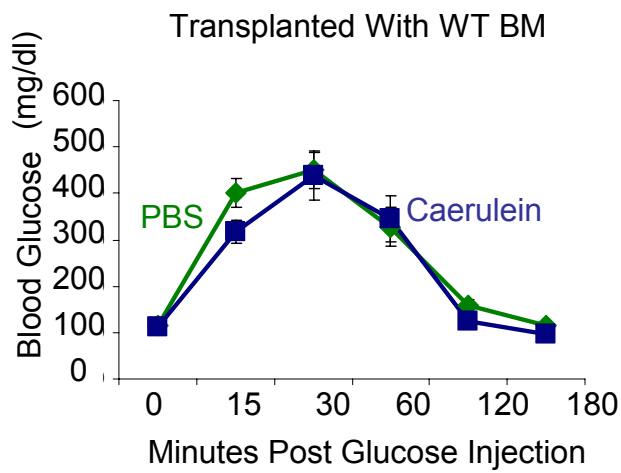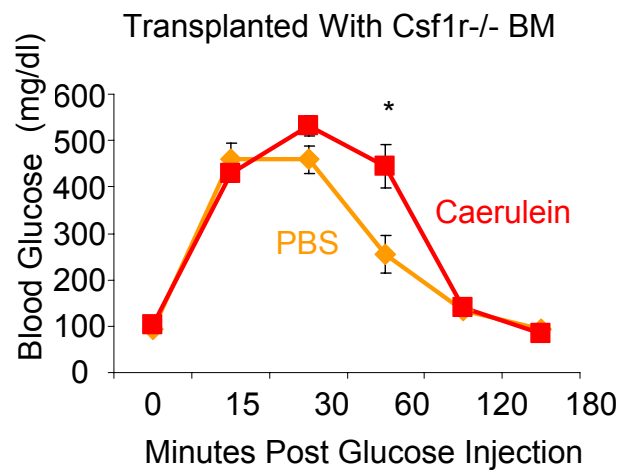

Supplement: db071577supplementaryfigures.pdf [file db071577supplementaryfigures.pdf]
